# Supplementary material for: Serum Symmetric Dimethylarginine as an Early Marker of Excretory Dysfunction in Canine Leishmaniosis(L. infantum)Induced Nephropathy
Source: Hindawi journal article supplement (doi:10.1155/2018/7517359), 2018-01-01
Supplement: f1 [file 7517359.f1.zip]

## Supplementary Table 1.

Clinical staging of canine leishmaniosis and relationship with prognosis according to LeishVet staging guidelines [16]

| Clinical stage                       | Serology                                 | Clinical signs                                                                                                   | Laboratory findings                                                                                                                                                                             | Prognosis       |
|--------------------------------------|------------------------------------------|------------------------------------------------------------------------------------------------------------------|-------------------------------------------------------------------------------------------------------------------------------------------------------------------------------------------------|-----------------|
| <b>Stage I: mild disease</b>         | Negative to low positive antibody levels | Mild clinical signs (peripheral lymphadenopathy) or papular dermatitis                                           | Usually no clinicopathological abnormalities observed. Normal renal profile: creatinine < 1.4 mg/dL, UPC < 0.5                                                                                  | Good            |
| <b>Stage II: moderate disease</b>    | Low to high positive antibody levels     | Apart from signs listed in stage I may present cutaneous lesions, anorexia, weight loss, fever or epistaxis.     | Mild non-regenerative anemia, hypergammaglobulinemia, hypoalbuminemia.<br>Substage a: Normal renal profile: creatinine < 1.4 mg/dL, UPC < 0.5<br>Substage b: Creatinine < 1.4 mg/dL, UPC: 0.5-1 | Good to guarded |
| <b>Stage III: severe disease</b>     | Low to high positive antibody levels     | Apart from signs listed in stages I and II may present signs derived from immune-complex lesions.                | Clinicopathological abnormalities listed in stage II. CKD IRIS stage I with UPC > 1 or stage II (creatinine: 1.4-2 mg/dL)                                                                       | Poor to guarded |
| <b>Stage IV: very severe disease</b> | Low to high positive antibody levels     | Clinical signs listed in stage III. Pulmonary thromboembolism, or nephrotic syndrome and end stage renal disease | Clinicopathological abnormalities listed in stage II. CKD IRIS stage III (creatinine 2-5 mg/dL) and stage IV (creatinine > 5mg/dL)<br>Nephrotic syndrome: UPC > 5                               | Guarded         |

CKD: chronic kidney disease. IRIS: international renal interest society. UPC: urinary protein ratio
