# Supplementary material for: Serum Symmetric Dimethylarginine as an Early Marker of Excretory Dysfunction in Canine Leishmaniosis (L. infantum) Induced Nephropathy
Source: Vet Med Int. 2018 May 13;2018:7517359. doi: 10.1155/2018/7517359 (PMC5971233; doi:10.1155/2018/7517359)
Supplement: Supplementary Materials — A table titled “Supplementary Table 1” is included depicting the criteria based on LeishVet staging guidelines that have been used for the clinical staging of dogs with leishmaniosis in this study. [file 7517359.f1.zip]

Archive with 2 entries (2 files):
- Supplementary material_VMI_2238292.docx
- supplementary material_VMI_2238293.pdf
